# Supplementary material
Source: HighWire-hosted journal article supplement (https://www.jpn.ca/highwire/filestream/89569/field_highwire_adjunct_files/0/jpn-140310-1-at.pdf)
Supplement: jpn-140310-1-at.pdf [file jpn-140310-1-at.pdf]

**Appendix 1** to Geisler D, Borchardt V, Lord AR, et al. Abnormal functional global and local brain connectivity in female patients with anorexia nervosa. *J Psychiatry Neurosci* 2015.

DOI: 10.1503/jpn.140310

Copyright © 2015 The Author(s) or their employer(s). To receive this resource in an accessible format, please contact us at [cmajgroup@cmaj.ca](mailto:cmajgroup@cmaj.ca).

## **Supplementary methods**

### ***Participants***

Participants with anorexia nervosa were recruited from specialized eating disorder programs of a university child and adolescent psychiatry and psychosomatic medicine department within 96 hours of initiating nutritional rehabilitation. Since nutritional rehabilitation has to be carried out with caution at the beginning of the treatment owing to possible complications, such as refeeding syndrome,<sup>1,2</sup> our patients had at that stage of treatment a calorie intake of about 1000–1500 kcal/d. The regular treatment program included a nutritional rehabilitation program with weight goals, regular meals, limitation of exercise and normalization of fluid intake. In addition patients received regular sessions of supportive psychotherapy. The multidisciplinary treatment included several elements: 1) individual and group counselling to restore healthy eating behaviours, 2) individual therapy based on cognitive behavioural principles that targeted dysfunctional thoughts, 3) group therapy to enhance motivation and self-confidence, 4) group psychoeducation for parents of patients. The patients also participated in occupational, art, body-oriented and relaxation sessions. However, within the first 96 hours patients participated only in a very limited subset of the aforementioned interventions. Body mass index (BMI) cut-offs for patients were defined according to Kromeyer-Hauschild and colleagues and Hebebrand and colleagues.<sup>3,4</sup>

Healthy controls were recruited through advertisement among middle school, high school and university students. For case-control age matching an implementation of the Munkres algorithm was used.<sup>5</sup>

Control participants were excluded (before scanning) if they had any history of psychiatric illness, a lifetime BMI below the tenth age percentile (if younger than 18 years)/BMI below 18.5 (if older than 18 years), or were currently obese (BMI not over 97th age percentile if younger than 18 years; BMI not over 30 if older than 18 years).

Participants of all study groups were excluded if they had a lifetime history of any of the following clinical diagnoses: organic brain syndrome, schizophrenia, substance dependence, psychosis not otherwise specified, bipolar disorder, bulimia nervosa or binge-eating disorder (or “regular” binge eating, which was defined as bingeing at least once weekly for 3 or more consecutive months). Further exclusion criteria for all participants were IQ lower than 85; psychotropic medication within 6 weeks prior to the study; current substance abuse; current inflammatory, neurologic or metabolic illness; chronic medical or neurological illness that could affect appetite, eating behaviour, or body weight (e.g. diabetes); clinically relevant anemia; pregnancy; and breastfeeding.

### ***Psychiatric and psychological assessments***

Exclusion criteria and possible confounding variables (e.g., the use of psychotropic medications and medical comorbidities), were determined using the expert version of the Structured Interview for Anorexia and Bulimia Nervosa (SIAB-EX) for DSM-IV<sup>6</sup> and our own semistructured interview. The SIAB-EX is a well-validated 87-item semi-standardized interview that assesses the prevalence and severity of specific eating-related psychopathology over the past 3 months. The interview provides diagnoses according to the ICD-10 and DSM-IV and is suitable for adolescents as well as adults. It has been used widely in eating disorder research.<sup>7-9</sup> A good inter-rater reliability ( $\kappa = 0.81$ ) for the diagnostic interview has been demonstrated.<sup>6</sup>

For patients with anorexia nervosa, comorbid psychiatric diagnoses other than eating disorders were derived from medical records and confirmed by an expert clinician with more than 10 years of experience after careful chart review (including consideration of medical and psychiatric history, physical examination, routine blood tests, urine analysis and a range of psychiatric screening instruments). All diagnostic information was ascertained at the time of treatment and the principal investigator of this study is also the chief consultant of the eating disorder treatment centre.

**Appendix 1** to Geisler D, Borchardt V, Lord AR, et al. Abnormal functional global and local brain connectivity in female patients with anorexia nervosa. *J Psychiatry Neurosci* 2015.

DOI: 10.1503/jpn.140310

Psychiatric conditions in potential healthy controls were ascertained using the same instruments as in patients (Table S1). All interviews were carried out by trained graduate students (psychology or medicine). If there were any indications of psychiatric symptoms, each case was discussed with a fully board-certified expert clinician and assessments were extended if necessary.

Handedness was assessed using a short version of the Annett Scale of Hand Preference<sup>10</sup> as previously implemented by Gollub and colleagues.<sup>11</sup> This questionnaire asks for handedness in typical daily life situations, such as writing or brushing teeth. Response categories are 0 (right hand), 1 (both hands) and 2 (left hand). A mean score for handedness was calculated.

Study data were collected and managed using secure, web-based electronic data capture tools, including REDCap (Research Electronic Data Capture<sup>12</sup>).

| Table S1: Clinical measures used during the assessment procedure.             |              |
|-------------------------------------------------------------------------------|--------------|
| Inventory                                                                     | Abbreviation |
| Structured Interview for Anorexia and Bulimia Nervosa for DSM-IV <sup>6</sup> | SIAB-EX      |
| Beck Depression Inventory II <sup>13</sup>                                    | BDI-II       |
| Eating Disorder Inventory 2 <sup>14</sup>                                     | EDI-2        |
| Revised symptom checklist 90 <sup>15</sup>                                    | SCL-90-R     |
| Wechsler Adult Intelligence Scale (short version) <sup>16</sup>               | WAIS*        |
| Wechsler Intelligence Scale for Children (short version) <sup>17</sup>        | WISC*        |

\*IQ was assessed with WAIS for participants aged ≥16 years or WISC otherwise.

**Functional MRI data preprocessing and analysis**

The following software tools were also used: DARTEL<sup>18</sup> for generating anatomical group templates, Nipype framework<sup>19</sup> for running imaging processing workflows, DPARSFA toolbox<sup>20</sup> for extraction of timeseries, R toolbox<sup>21</sup> for statistical analysis, and BrainNet Viewer<sup>22</sup> software for visualization of brain networks.

During preprocessing smoothing was not performed, because it would impose new correlations among seed regions, emphasizing those that are adjacent and hence bias the network structure toward a lattice topology and alter graph metrics.<sup>23</sup> Similarly, during preprocessing we did not apply global mean regression, which would bias correlations and complicate the interpretation of negative correlations.<sup>24</sup>

The resulting volumes were parcellated into 160 spherical regions of interest (ROIs), as defined by Dosenbach.<sup>25</sup> This functionally defined parcellation scheme has been derived from meta-analyses of task-related fMRI studies, covers the cerebrum and cerebellum, and consists of nonoverlapping spheres with a diameter of 10 mm.

To assess whether residual motion biases group differences by causing spurious correlation structures throughout the brain, which would be reflected in the derived graph metrics, the data sets were reprocessed with additional application of scrubbing after regression of nuisance covariates to eliminate timepoints with a framewise displacement > 0.5 mm.<sup>26</sup> According to standard procedure, 1 preceding and 2 subsequent timepoints were also excluded.<sup>26</sup> Two-sample *t* tests were used to test for potential differences of framewise displacement and subsequently for differences in length of time series after scrubbing.

To test whether previously observed group differences persist after the application of scrubbing, between-group comparisons on global as well as local graph metrics were performed and the resulting *p* values were false discovery rate (FDR)-corrected for the number of tests.

**Appendix 1** to Geisler D, Borchardt V, Lord AR, et al. Abnormal functional global and local brain connectivity in female patients with anorexia nervosa. *J Psychiatry Neurosci* 2015.

DOI: 10.1503/jpn.140310

*Structural MRI data preprocessing and analysis*

For measuring cortical thickness (CT) and grey matter volumes the structural data were registered, motion-corrected, realigned, averaged and analyzed in an automated manner with the FreeSurfer software suite (<http://surfer.nmr.mgh.harvard.edu>, version 5.1.0), a well-documented program for volumetric segmentation and cortical surface reconstruction.<sup>27–32</sup>

Using standard FreeSurfer procedures to measure CT, surface reconstruction was first performed for each hemisphere and included tessellation of the grey matter–white matter boundary, automated topology correction and surface deformation following intensity gradients to optimally place the grey–white and grey–cerebrospinal fluid borders at the location where the greatest shift in intensity defines the transition to the other tissue class. The resulting surfaces were then used to calculate CT at each vertex as the closest distance from the grey–white boundary to the pial surface. For the subcortical volumetric analyses, we used the automated segmentation procedures implemented in the FreeSurfer pipeline to assign an anatomical label to each voxel based on probabilistic information estimated from a manually labelled training set. The quality of the surface reconstruction and segmentation was assured according to FreeSurfer user guidelines by visual inspection of the resulting output and, if necessary, edited with minor manual intervention.

The output of the FreeSurfer standard procedure includes total grey matter volume, intracranial volume, volumes of subcortical labels<sup>28</sup> and thickness values of cortical labels based on the Desikan-Killiany atlas.<sup>27</sup> Furthermore, we calculated the right and left hemispheric thickness by averaging the thickness values of all right and left hemispheric labels, respectively. We also extracted the cortical thickness values and grey matter volume for the cortical subset of the 160 Dosenbach ROIs as follows: (1) for each ROI in volume space we created a surface-based ROI by mapping the volume on the surface of the FreeSurfer standard brain; (2) for every participant and for all surface-based ROIs the mean thickness value and surface area was extracted; and (3) using cortical thickness and area we calculated the grey matter volumes of the cortical ROIs.

**Table S2: Extracted cortical thickness values, cortical and subcortical volumes across groups used for correlational analysis**

| Group            | Region; mean ± SD*                        |                                |                               |                                       |                                        |                                        |                                               |                              |                                     |
|------------------|-------------------------------------------|--------------------------------|-------------------------------|---------------------------------------|----------------------------------------|----------------------------------------|-----------------------------------------------|------------------------------|-------------------------------------|
|                  | Total grey matter volume, cm <sup>3</sup> | Right hemisphere thickness, mm | Left hemisphere thickness, mm | Left thalamus volume, cm <sup>3</sup> | Right thalamus volume, cm <sup>3</sup> | Left midinsula volume, mm <sup>3</sup> | Left posterior insula volume, mm <sup>3</sup> | Left midinsula thickness, mm | Left posterior insula thickness, mm |
| Anorexia nervosa | 654.5 ± 51.30†                            | 2.72 ± 0.13†                   | 2.70 ± 0.13†                  | 6.84 ± 0.54†                          | 6.94 ± 0.55†                           | 112.6 ± 31.1                           | 108.2 ± 25.4                                  | 3.82 ± 0.49                  | 2.42 ± 0.29                         |
| Control          | 727.5 ± 60.07†                            | 2.9 ± 0.16†                    | 2.90 ± 0.15†                  | 7.51 ± 0.65†                          | 7.58 ± 0.70†                           | 105.6 ± 32.3                           | 99.5 ± 20.3                                   | 3.75 ± 0.24                  | 2.53 ± 0.24                         |

SD = standard deviation.

\*The local regions of interest correspond exactly to the seed regions used in our resting state connectivity analysis.

†Group differences were tested using Student *t* tests, *p* < 0.001.

**Appendix 1** to Geisler D, Borchardt V, Lord AR, et al. Abnormal functional global and local brain connectivity in female patients with anorexia nervosa. *J Psychiatry Neurosci* 2015.

DOI: 10.1503/jpn.140310

### *Additional statistical analyses*

Demographic and symptom variables were compared using Student *t* tests. Correlational analyses were performed using Pearson coefficients. In all statistical analyses we used age-adjusted BMI standard deviation scores (BMI-SDS) calculated using the LMS method from Cole and German population reference data from Kromeyer-Hauschild and colleagues (for participants  $\leq 18$  yr) and Hemmelmann and colleagues (for participants  $\geq 19$  yr).<sup>4,33,34</sup> The BMI-SDS is a better measure than absolute BMI in pediatric populations because what is considered a healthy BMI changes with age.<sup>4,35</sup>

### **Supplementary results**

#### *Motion and time series*

A 2-sample *t* test revealed no significant differences in framewise displacement index (FWD) between groups (control: mean  $0.199 \pm 0.145$ ; anorexia nervosa: mean  $0.168 \pm 0.086$ ;  $t_{68} = 1.08$ ,  $p = 0.28$ ). The number of remaining timepoints after scrubbing did not significantly differ between groups (control: mean  $169.86 \pm 30.66$ ; anorexia nervosa: mean  $178.23 \pm 20.84$ ;  $t_{68} = -1.32$ ,  $p = 0.10$ ).

**Appendix 1** to Geisler D, Borchardt V, Lord AR, et al. Abnormal functional global and local brain connectivity in female patients with anorexia nervosa. *J Psychiatry Neurosci* 2015.

DOI: 10.1503/jpn.140310

### *Group differences in graph metrics*

After the application of scrubbing, previously observed group differences revealed in local and global graph metrics remained significant ( $p < 0.05$ , FDR-corrected).

| Table S3: Group differences in local and global graph metrics for scrubbed data (FWD < 0.5mm) including specific $p$ values, FDR corrected for the number of tests (part 1 of 2) |               |                 |           |
|----------------------------------------------------------------------------------------------------------------------------------------------------------------------------------|---------------|-----------------|-----------|
| Sparsity, %                                                                                                                                                                      | Metric        | ROI             | $p$ value |
| Global                                                                                                                                                                           |               |                 |           |
| 18                                                                                                                                                                               | CPL           | Global          | 0.044     |
| 22                                                                                                                                                                               | CPL           | Global          | 0.027     |
| 24                                                                                                                                                                               | CPL           | Global          | 0.019     |
| 26                                                                                                                                                                               | CPL           | Global          | 0.015     |
| 28                                                                                                                                                                               | CPL           | Global          | 0.015     |
| 30                                                                                                                                                                               | CPL           | Global          | 0.016     |
| 18                                                                                                                                                                               | Assortativity | Global          | 0.044     |
| 20                                                                                                                                                                               | Assortativity | Global          | 0.040     |
| 22                                                                                                                                                                               | Assortativity | Global          | 0.027     |
| 24                                                                                                                                                                               | Assortativity | Global          | 0.019     |
| 26                                                                                                                                                                               | Assortativity | Global          | 0.015     |
| 28                                                                                                                                                                               | Assortativity | Global          | 0.015     |
| Local                                                                                                                                                                            |               |                 |           |
| 10                                                                                                                                                                               | Strength      | Midinsula_L_61  | 0.002     |
| 10                                                                                                                                                                               | Strength      | Postinsula_L_76 | 0.001     |
| 10                                                                                                                                                                               | Degree        | Midinsula_L_61  | 0.003     |
| 10                                                                                                                                                                               | Degree        | Postinsula_L_76 | 0.001     |
| 10                                                                                                                                                                               | CPL           | Midinsula_L_61  | 0.001     |
| 10                                                                                                                                                                               | CPL           | Postinsula_L_76 | 0.002     |
| 10                                                                                                                                                                               | CPL           | Thalamus_L_47   | 0.001     |
| 10                                                                                                                                                                               | CPL           | Thalamus_R_58   | 0.002     |
| 12                                                                                                                                                                               | Strength      | Midinsula_L_61  | 0.002     |
| 12                                                                                                                                                                               | Strength      | Postinsula_L_76 | 0.001     |
| 12                                                                                                                                                                               | Degree        | Postinsula_L_76 | 0.001     |

CPL = characteristic path length.

**Appendix 1** to Geisler D, Borchardt V, Lord AR, et al. Abnormal functional global and local brain connectivity in female patients with anorexia nervosa. *J Psychiatry Neurosci* 2015.

DOI: 10.1503/jpn.140310

| Table S3: Group differences in local and global graph metrics for scrubbed data (FWD< 0.5mm) including specific <i>p</i> values, FDR corrected for the number of tests (part 2 of 2)                                |                    |                     |                |
|---------------------------------------------------------------------------------------------------------------------------------------------------------------------------------------------------------------------|--------------------|---------------------|----------------|
| Sparsity, %                                                                                                                                                                                                         | Metric             | ROI                 | <i>p</i> value |
| Local (continued)                                                                                                                                                                                                   |                    |                     |                |
| 12                                                                                                                                                                                                                  | CPL <sub>loc</sub> | Postinsula_L_76     | 0.002          |
| 12                                                                                                                                                                                                                  | CPL <sub>loc</sub> | Thalamus_L_47       | 0.001          |
| 12                                                                                                                                                                                                                  | CPL <sub>loc</sub> | Thalamus_R_58       | 0.001          |
| 14                                                                                                                                                                                                                  | Strength           | Midinsula_L_61      | 0.001          |
| 14                                                                                                                                                                                                                  | Strength           | Postinsula_L_76     | 0.001          |
| 14                                                                                                                                                                                                                  | Strength           | Thalamus_L_47       | 0.002          |
| 14                                                                                                                                                                                                                  | Degree             | Midinsula_L_61      | 0.001          |
| 14                                                                                                                                                                                                                  | Degree             | Postinsula_L_76     | 0.001          |
| 14                                                                                                                                                                                                                  | CPL <sub>loc</sub> | Midinsula_L_61      | 0.001          |
| 14                                                                                                                                                                                                                  | CPL <sub>loc</sub> | Postinsula_L_76     | 0.003          |
| 14                                                                                                                                                                                                                  | CPL <sub>loc</sub> | Thalamus_L_47       | 0.002          |
| 14                                                                                                                                                                                                                  | CPL <sub>loc</sub> | Thalamus_R_58       | 0.002          |
| 14                                                                                                                                                                                                                  | LEGE               | Postoccipital_R_158 | 0.002          |
| 16                                                                                                                                                                                                                  | Strength           | Midinsula_L_61      | 0.001          |
| 16                                                                                                                                                                                                                  | Strength           | Postinsula_L_76     | 0.002          |
| 16                                                                                                                                                                                                                  | Strength           | Thalamus_L_47       | 0.002          |
| 16                                                                                                                                                                                                                  | Degree             | Midinsula_L_61      | 0.001          |
| 16                                                                                                                                                                                                                  | Degree             | Postinsula_L_76     | 0.002          |
| 16                                                                                                                                                                                                                  | CPL <sub>loc</sub> | Midinsula_L_61      | 0.001          |
| 16                                                                                                                                                                                                                  | CPL <sub>loc</sub> | Postinsula_L_76     | 0.003          |
| 16                                                                                                                                                                                                                  | CPL <sub>loc</sub> | Thalamus_L_47       | 0.003          |
| 16                                                                                                                                                                                                                  | CPL <sub>loc</sub> | Thalamus_R_58       | 0.002          |
| 16                                                                                                                                                                                                                  | LEGE               | Postoccipital_R_158 | 0.001          |
| 16                                                                                                                                                                                                                  | E <sub>loc</sub>   | aPFC_R_2            | 0.001          |
| 24                                                                                                                                                                                                                  | LEGE               | Postoccipital_R_158 | 0.001          |
| CPL <sub>loc</sub> = characteristic path length; E <sub>loc</sub> = local efficiency; FDR = false discovery rate; FWD = framewise displacement index; LEGE = normalized local efficiency; ROI = region of interest. |                    |                     |                |

**Appendix 1** to Geisler D, Borchardt V, Lord AR, et al. Abnormal functional global and local brain connectivity in female patients with anorexia nervosa. *J Psychiatry Neurosci* 2015.

DOI: 10.1503/jpn.140310

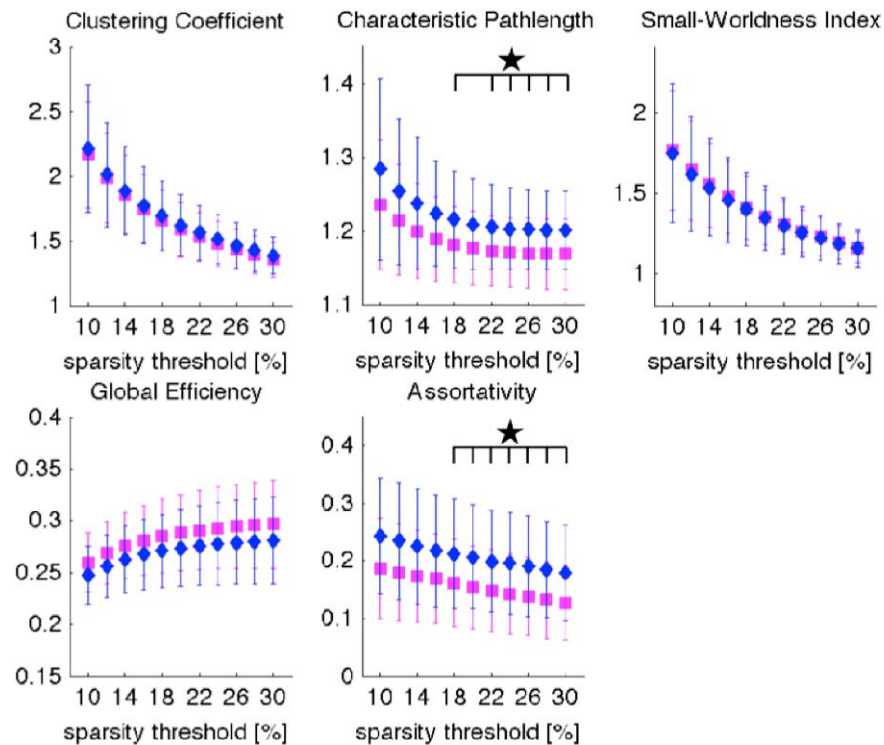

**Fig. S1:** Topological properties of brain networks of healthy controls (magenta squares) and patients with anorexia nervosa (blue diamonds). Global graph metrics derived from scrubbed data sets are depicted: clustering coefficient (CC), characteristic path length (CPL), small-worldness index (SWI) as well as global efficiency ( $E_{\text{glob}}$ ) and assortativity ( $\alpha$ ) for sparsity thresholds between 10% and 30%.

**Appendix 1** to Geisler D, Borchardt V, Lord AR, et al. Abnormal functional global and local brain connectivity in female patients with anorexia nervosa. *J Psychiatry Neurosci* 2015.

DOI: 10.1503/jpn.140310

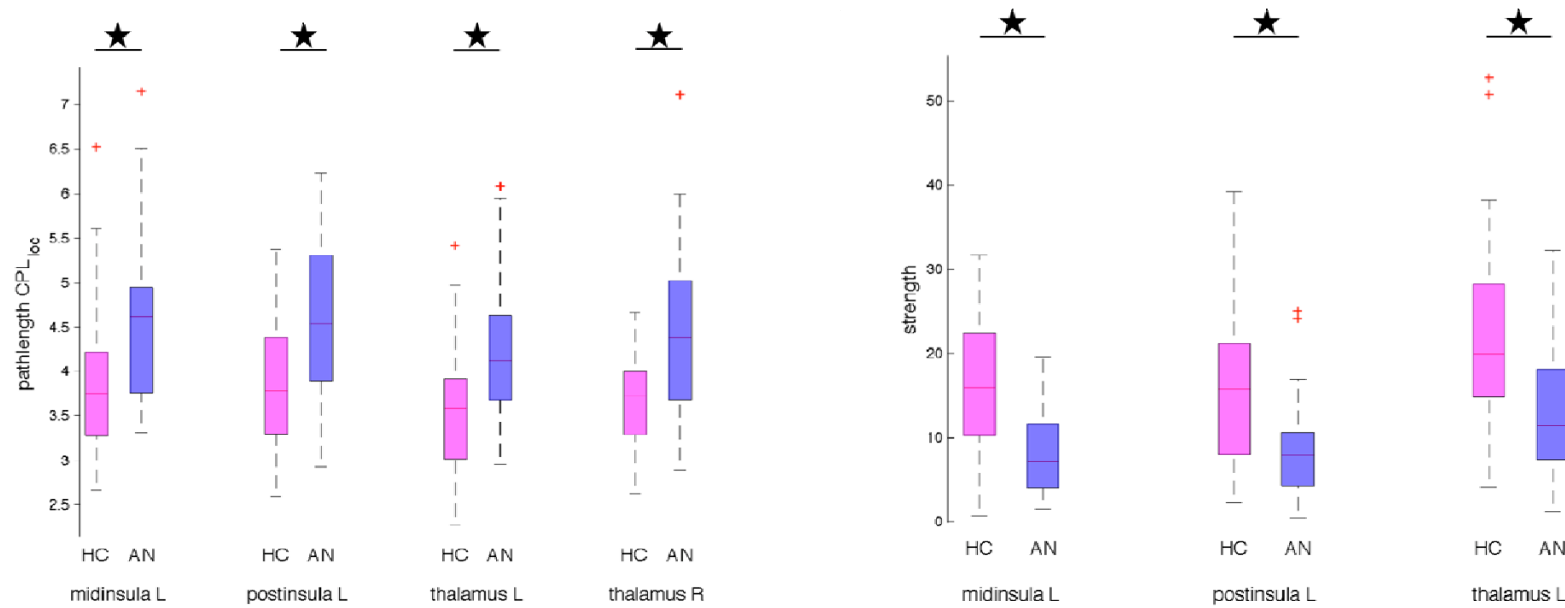

**Fig. S2:** Significant differences between healthy controls (HC; magenta) and patients with anorexia nervosa (AN; blue) at a sparsity threshold of 16% after scrubbing of the data sets. Group differences in the metric characteristic path length ( $CPL_{loc}$ ) in the left middle insula, left posterior insula, left thalamus and right thalamus are depicted in the left panel. The right panel depicts group differences in the metric strength in the left middle insula, left posterior insula and left thalamus.



**Appendix 1** to Geisler D, Borchardt V, Lord AR, et al. Abnormal functional global and local brain connectivity in female patients with anorexia nervosa. *J Psychiatry Neurosci* 2015.

DOI: 10.1503/jpn.140310

### *Topological properties*

**Table S4: Correlations between selected global graph theoretical metrics and grey matter thickness (with age as a covariate) or grey matter volume (with age and total intracranial volume as covariates) in patients with anorexia nervosa**

| Metric   | Measure; <i>r</i> , <i>p</i> value |      |                           |      |                          |      |
|----------|------------------------------------|------|---------------------------|------|--------------------------|------|
|          | Right hemisphere thickness         |      | Left hemisphere thickness |      | Total grey matter volume |      |
| $\alpha$ | 0.121                              | 0.51 | 0.088                     | 0.63 | 0.142                    | 0.45 |
| CPL      | -0.100                             | 0.59 | -0.174                    | 0.34 | -0.019                   | 0.92 |

CPL = characteristic path length.

**Table S5: Correlations between age and graph theoretical metrics across groups**

| Metric   | Group; <i>r</i> , <i>p</i> value |      |         |      |
|----------|----------------------------------|------|---------|------|
|          | Anorexia nervosa                 |      | Control |      |
| $\alpha$ | 0.153                            | 0.38 | 0.186   | 0.29 |
| CPL      | 0.075                            | 0.67 | 0.152   | 0.38 |

CPL = characteristic path length.

**Appendix 1** to Geisler D, Borchardt V, Lord AR, et al. Abnormal functional global and local brain connectivity in female patients with anorexia nervosa. *J Psychiatry Neurosci* 2015.

DOI: 10.1503/jpn.140310

### Nodal characteristics

**Table S6: Correlations between local graph theoretical metrics and grey matter volume (with age and total intracranial volume as covariates) and cortical thickness (with age as a covariate) of exactly corresponding customized regions of interest in patients with anorexia nervosa**

| Region                     | Measure; <i>r</i> , <i>p</i> value |      |                       |      |                       |      |                              |      |                          |      |                                 |      |
|----------------------------|------------------------------------|------|-----------------------|------|-----------------------|------|------------------------------|------|--------------------------|------|---------------------------------|------|
|                            | Left thalamus volume               |      | Right thalamus volume |      | Left midinsula volume |      | Left posterior insula volume |      | Left midinsula thickness |      | Left posterior insula thickness |      |
| Thalamus_L_47_PathLength   | 0.024                              | 0.90 | —                     | —    | —                     | —    | —                            | —    | —                        | —    | —                               | —    |
| Thalamus_L_47_Strength     | -0.069                             | 0.71 | —                     | —    | —                     | —    | —                            | —    | —                        | —    | —                               | —    |
| Thalamus_R_58_PathLength   | —                                  | —    | 0.098                 | 0.60 | —                     | —    | —                            | —    | —                        | —    | —                               | —    |
| Thalamus_R_58_Strength     | —                                  | —    | 0.064                 | 0.73 | —                     | —    | —                            | —    | —                        | —    | —                               | —    |
| Midinsula_L_61_PathLength  | —                                  | —    | —                     | —    | -0.024                | 0.89 | —                            | —    | -0.008                   | 0.97 | —                               | —    |
| Midinsula_L_61_Strength    | —                                  | —    | —                     | —    | -0.114                | 0.52 | —                            | —    | 0.017                    | 0.93 | —                               | —    |
| Postinsula_L_76_PathLength | —                                  | —    | —                     | —    | —                     | —    | 0.060                        | 0.74 | —                        | —    | -0.470                          | 0.80 |
| Postinsula_L_76_Strength   | —                                  | —    | —                     | —    | —                     | —    | -0.067                       | 0.71 | —                        | —    | 0.009                           | 0.96 |

**Table S7: Correlations between age and graph-theoretical metrics across groups.**

| Region                     | Group; <i>r</i> , <i>p</i> value |      |         |      |
|----------------------------|----------------------------------|------|---------|------|
|                            | Anorexia nervosa                 |      | Control |      |
| Thalamus_L_47_PathLength   | 0.009                            | 0.96 | 0.048   | 0.78 |
| Thalamus_L_47_Strength     | 0.063                            | 0.70 | -0.089  | 0.61 |
| Thalamus_R_58_PathLength   | 0.158                            | 0.36 | 0.050   | 0.78 |
| Thalamus_R_58_Strength     | -0.199                           | 0.25 | -0.050  | 0.78 |
| Midinsula_L_61_PathLength  | 0.055                            | 0.76 | 0.224   | 0.20 |
| Midinsula_L_61_Strength    | -0.072                           | 0.68 | -0.305  | 0.08 |
| Postinsula_L_76_PathLength | -0.151                           | 0.39 | -0.003  | 0.99 |
| Postinsula_L_76_Strength   | 0.250                            | 0.15 | -0.031  | 0.86 |

**Appendix 1** to Geisler D, Borchardt V, Lord AR, et al. Abnormal functional global and local brain connectivity in female patients with anorexia nervosa. *J Psychiatry Neurosci* 2015.

DOI: 10.1503/jpn.140310

**Table S8: Overview of all known resting-state functional connectivity studies in anorexia nervosa**

| Study*                       | Method     | N                        | DMN                                                                          | Cognitive-control network                         | Saliency network                                           | Sensory-motor network             | Visual network                                 | Other                                                 |
|------------------------------|------------|--------------------------|------------------------------------------------------------------------------|---------------------------------------------------|------------------------------------------------------------|-----------------------------------|------------------------------------------------|-------------------------------------------------------|
| Cowdrey et al <sup>36</sup>  | ICA        | recAN=16, HC=15          | recAN>HC: Precuneus, dlPFC/IFG                                               | No difference                                     |                                                            | No difference                     | No difference                                  |                                                       |
| Favaro et al <sup>37</sup>   | ICA        | acAN=29, recAN=16, HC=26 |                                                                              |                                                   |                                                            | acAN>HC: Superior parietal cortex | acAN<HC, recAN<HC: occipital temporal junction |                                                       |
| McFadden et al <sup>38</sup> | ICA        | acAN=20, recAN=24, HC=24 | acAN<HC: Precuneus                                                           |                                                   | acAN<HC, recAN<HC: ACC                                     |                                   |                                                |                                                       |
| Amianto et al <sup>39</sup>  | ICA        | acAN=12, BN=12, HC=10    |                                                                              |                                                   |                                                            |                                   |                                                | AN>HC: Cerebellum                                     |
| Boehm et al <sup>40</sup>    | ICA        | acAN=35, HC=35           | acAN>HC: Anterior insula                                                     | acAN>HC: Angular gyrus                            | No difference                                              | No difference                     | No difference                                  |                                                       |
| Favaro et al <sup>41</sup>   | Seed-based | acAN=33, HC=30           |                                                                              | No difference with seed in dlPFC, vmPFC and vlPFC |                                                            |                                   |                                                |                                                       |
| Favaro et al <sup>42</sup>   | Seed-based | acAN=35, recAN=16, HC=35 |                                                                              |                                                   |                                                            |                                   |                                                | acAN<HC: dorsal rostral putamen and bilateral putamen |
| Lee et al <sup>43</sup>      | Seed-based | acAN=18, BN=20, HC=20    | acAN>HC: dACC and precuneus, retrosplenial cortex<br>acAN<HC: dACC and dlPFC |                                                   |                                                            |                                   |                                                |                                                       |
| Kim et al <sup>44</sup>      | Seed-based | acAN=18, BN=20, HC=20    |                                                                              |                                                   | acAN>HC: Left anterior insula and right IFG/insula cluster |                                   |                                                |                                                       |

acAN: patients acutely ill with anorexia nervosa; ACC: anterior cingulate cortex; BN = bulimia nervosa; dACC: dorsal anterior cingulate cortex; dlPFC: dorsolateral prefrontal cortex; DMN: default mode network; HC: healthy control; ICA: independent component analyses; IFG: inferior frontal gyrus; recAN: patients recovered from anorexia nervosa; vlPFC: ventrolateral prefrontal cortex; vmPFC: ventromedial prefrontal cortex.

\*In the studies by McFadden and colleagues and Kim and colleagues, fMRI data were acquired during a conditioned stimulus task and a picture processing task.

**Appendix 1** to Geisler D, Borchardt V, Lord AR, et al. Abnormal functional global and local brain connectivity in female patients with anorexia nervosa. *J Psychiatry Neurosci* 2015.

DOI: 10.1503/jpn.140310

**Table S9: Overview of task-based fMRI studies in anorexia nervosa (by category in alphabetical order, selection), that have (indirectly) targeted insular dysfunction (i.e. by using food, body or pain stimuli) and reported findings related to the insula (part 1 of 2)**

| Study*                          | N                        | Paradigm                                                                                                                           | Results                                                                                                                                                                                                                                                                                       |
|---------------------------------|--------------------------|------------------------------------------------------------------------------------------------------------------------------------|-----------------------------------------------------------------------------------------------------------------------------------------------------------------------------------------------------------------------------------------------------------------------------------------------|
| <b>Food</b>                     |                          |                                                                                                                                    |                                                                                                                                                                                                                                                                                               |
| Brooks et al <sup>45</sup>      | acAN=18, BN=8, HC=24     | Passive viewing of food and non-food images                                                                                        | <ul style="list-style-type: none"> <li>• BN&lt;HC: superior temporal gyrus/insula, visual cortex,</li> <li>• BN&lt;AN: right parietal lobe, left dorsal posterior cingulate cortex;</li> <li>• BN&gt;AN: right superior temporal gyrus and left supplementary motor area</li> </ul>           |
| Cowdrey et al <sup>46</sup>     | recAN=15, HC=16          | Oral application of pleasant and aversive taste stimuli and presentation of food images                                            | <ul style="list-style-type: none"> <li>• Pleasant taste: recAN&gt;HC: ventral striatum;</li> <li>• Pleasant image: recAN&gt;HC: occipital cortex;</li> <li>• Aversive taste: recAN&gt;HC: insula, putamen,</li> <li>• Aversive image: recAN&gt;HC: ACC, caudate</li> </ul>                    |
| Frank et al <sup>47</sup>       | acAN=21, obese=19, HC=23 | Conditioning task associating oral application of sucrose solution, no sucrose solution or artificial saliva with geometric shapes | <ul style="list-style-type: none"> <li>• Estimated prediction error-associated BOLD response: AN&gt;HC: anteroventral striatum, insula, PFC</li> </ul>                                                                                                                                        |
| Gizewski et al <sup>48</sup>    | acAN=12, HC=12,          | Passive viewing of food and non-food images before and after eating                                                                | <ul style="list-style-type: none"> <li>• Premeal: food: acAN&gt;HC: midcingulate cortex; HC&gt;acAN: pregenual ACC;</li> <li>• Postmeal: food: acAN&gt;HC: left insula; HC&gt;acAN: right insula, right PFC</li> </ul>                                                                        |
| Holsen et al <sup>49</sup>      | acAN=12, recAN=10, HC=11 | Passive viewing of food and non-food images before and after eating                                                                | <ul style="list-style-type: none"> <li>• Premeal: food: acAN, recAN&lt;HC: hypothalamus, amygdala, anterior insula</li> <li>• Postmeal: food: acAN&lt;HC: anterior insula</li> </ul>                                                                                                          |
| Lawson et al <sup>50</sup>      | acAN=13, recAN=9, HC=13  | Passive viewing of food and non-food images before and after eating, association with leptin and oxytocin level                    | <ul style="list-style-type: none"> <li>• Premeal: oxytocin was associated with activation differences between AN and HC in the hypothalamus, amygdala, hippocampus, OFC and insula</li> <li>• Postmeal: oxytocin was associated with activation differences in amygdala and insula</li> </ul> |
| Oberndorfer et al <sup>51</sup> | recAN=14, HC=12          | Visual anticipatory task of food and non-food images                                                                               | <ul style="list-style-type: none"> <li>• Anticipation of food images: recAN&gt;HC: right ventral anterior insula</li> </ul>                                                                                                                                                                   |
| Wagner et al <sup>52</sup>      | recAN=16, HC=16          | Oral application of sucrose solution or water                                                                                      | <ul style="list-style-type: none"> <li>• Sucrose &amp; water: recAN&lt;HC: insula, ventral and dorsal striatum</li> </ul>                                                                                                                                                                     |

**Appendix 1** to Geisler D, Borchardt V, Lord AR, et al. Abnormal functional global and local brain connectivity in female patients with anorexia nervosa. *J Psychiatry Neurosci* 2015.

DOI: 10.1503/jpn.140310

**Table S9: Overview of task-based fMRI studies in anorexia nervosa (by category in alphabetical order, selection), that have (indirectly) targeted insular dysfunction (i.e. by using food, body or pain stimuli) and reported findings related to the insula (part 2 of 2)**

| Study*                         | N               | Paradigm                                                                               | Results                                                                                                                                                                                                  |
|--------------------------------|-----------------|----------------------------------------------------------------------------------------|----------------------------------------------------------------------------------------------------------------------------------------------------------------------------------------------------------|
| <b>Body</b>                    |                 |                                                                                        |                                                                                                                                                                                                          |
| Friederich et al <sup>53</sup> | acAN=17, HC=18  | Comparison of themselves with images of slim idealized female bodies                   | <ul style="list-style-type: none"> <li>acAN&gt;HC: insula, premotor cortex,</li> <li>acAN&lt;HC: rostral ACC</li> </ul>                                                                                  |
| Mohr et al <sup>54</sup>       | acAN=16, HC=16  | Body satisfaction task that includes selecting an image matching their ideal body size | <ul style="list-style-type: none"> <li>Satisfaction: acAN&gt;HC: insula, lateral PFC</li> </ul>                                                                                                          |
| Redgrave et al <sup>55</sup>   | acAN=6, HC=6    | Emotional Stroop task with fat, thin and neutral words                                 | <ul style="list-style-type: none"> <li>Thin: acAN&gt;HC: junction of left insula, frontal and temporal lobes, medial frontal gyrus</li> <li>Fat: acAN&lt;HC: left dlPFC, right parietal areas</li> </ul> |
| Sachdev et al <sup>56</sup>    | acAN=10, HC=10  | Passive viewing of self- and non-self-images                                           | <ul style="list-style-type: none"> <li>Self-image: acAN&lt;HC: middle frontal gyrus, insula, precuneus, occipital region</li> </ul>                                                                      |
| <b>Pain</b>                    |                 |                                                                                        |                                                                                                                                                                                                          |
| Bär et al <sup>57</sup>        | acAN=19, HC=19  | Delivery of noxious thermal stimuli                                                    | <ul style="list-style-type: none"> <li>acAN&lt;HC: left insula, superior temporal gyrus</li> </ul>                                                                                                       |
| Strigo et al <sup>58</sup>     | recAN=12, HC=10 | Pain anticipation task; delivery of noxious thermal stimuli                            | <ul style="list-style-type: none"> <li>Pain anticipation: recAN&gt;HC: right anterior insula, dlPFC</li> <li>Pain experience: recAN&gt;HC: dlPFC; recAN&lt;HC: posterior insula</li> </ul>               |

acAN: patients acutely ill with anorexia nervosa; ACC: anterior cingulate cortex; BN: patients acutely ill with bulimia nervosa; dlPFC: dorsolateral prefrontal cortex; HC: healthy control; OFC: orbitofrontal cortex; PFC: prefrontal cortex; recAN: patients recovered from anorexia nervosa.

\*The 2 studies by Holsen and Lawson are based on the same sample/fMRI data.

**Appendix 1** to Geisler D, Borchardt V, Lord AR, et al. Abnormal functional global and local brain connectivity in female patients with anorexia nervosa. *J Psychiatry Neurosci* 2015.

DOI: 10.1503/jpn.140310

## References

1. Ehrlich S, Querfeld U, Pfeiffer E. Refeeding oedema: an important complication in the treatment of anorexia nervosa. *Eur Child Adolesc Psychiatry* 2006;15:241–3.
2. Tey HL, Lim SC, Snodgrass AM. Refeeding oedema in anorexia nervosa. *Singapore Med J* 2005;46:308–10.
3. Hebebrand J, Casper R, Treasure J, et al. The need to revise the diagnostic criteria for anorexia nervosa. *J Neural Transm* 2004;111:827–40.
4. Kromeyer-Hauschild K, Wabitsch M, Kunze D, et al. Perzentile für den Body-mass-Index für das Kindes- und Jugendalter unter Heranziehung verschiedener deutscher Stichproben. *Monatsschrift Kinderheilkunde* 2001;149:807–18.
5. Munkres J. Algorithms for the Assignment and Transportation Problems. *Journal of the Society for Industrial and Applied Mathematics* 1957;5:32–8.
6. Fichter M, Quadflieg N. The structured interview for anorexic and bulimic disorders for DSM-IV and ICD-10 (SIAB-EX): reliability and validity. *Eur Psychiatry* 2001;16:38–48.
7. Kaye WH, Bulik CM, Thornton L, et al. Comorbidity of anxiety disorders with anorexia and bulimia nervosa. *Am J Psychiatry* 2004;161:2215–21.
8. Zipfel S, Wild B, Groß G, et al. Focal psychodynamic therapy, cognitive behaviour therapy, and optimised treatment as usual in outpatients with anorexia nervosa (ANTOP study): randomised controlled trial. *Lancet* 2014;383:127–37.
9. Giel KE, Friederich H-C, Teufel M, et al. Attentional processing of food pictures in individuals with anorexia nervosa—an eye-tracking study. *Biol Psychiatry* 2011;69:661–7.
10. Annett M. A classification of hand preference by association analysis. *Br J Psychol* 1970;61:303–21.
11. Gollub RL, Shoemaker JM, King MD, et al. The MCIC collection: a shared repository of multi-modal, multi-site brain image data from a clinical investigation of schizophrenia. *Neuroinformatics* 2013;11:367–88.
12. Harris PA, Taylor R, Thielke R, et al. Research electronic data capture (REDCap)—a metadata-driven methodology and workflow process for providing translational research informatics support. *J Biomed Inform* 2009;42:377–81.
13. Hautzinger M, Kühner C, Keller F. *BDI-II Beck-Depressions-Inventar*. 2nd ed. Frankfurt: Pearson Assessment & Information GmbH; 2009.
14. Paul T, Thiel A. *Eating Disorder Inventory-2 (EDI-2)*. Göttingen: Hogrefe; 2005.
15. Schmitz N, Hartkamp N, Kiuse J, et al. The Symptom Check-List-90-R (SCL-90-R): a German validation study. *Qual Life Res* 2000;9:185–93.
16. Von Aster M, Neubauer AC, Horn R. *WIE - Wechsler Intelligenztest für Erwachsene*. Bern: Huber; 2006.
17. Petermann F, Petermann U. *Hamburg Wechsler Intelligenztest für Kinder IV (HAWIK-IV)*. Bern: Huber; 2006.
18. Ashburner J. A fast diffeomorphic image registration algorithm. *Neuroimage* 2007;38:95–113.
19. Gorgolewski K, Burns CD, Madison C, et al. Nipype: a flexible, lightweight and extensible neuroimaging data processing framework in python. *Front Neuroinform* 2011;5:13.
20. Yan C-G, Zang Y-F. DPARSF: A MATLAB Toolbox for “Pipeline” Data Analysis of Resting-State fMRI. *Frontiers in systems neuroscience* 2010;4:13.
21. R Core Team. R: A Language and Environment for Statistical Computing. Vienna, Austria: R Foundation for Statistical Computing; 2012.
22. Xia M, Wang J, He Y. BrainNet Viewer: A Network Visualization Tool for Human Brain Connectomics. Csermely P, editor. *PLoS ONE* 2013;8:e68910.
23. Fornito A, Zalesky A, Bullmore ET. Network scaling effects in graph analytic studies of human resting-state FMRI data. *Front Syst Neurosci* 2010;4:22.
24. Saad ZS, Gotts SJ, Murphy K, et al. Trouble at rest: how correlation patterns and group differences become distorted after global signal regression. *Brain Connect* 2012;2:25–32.
25. Dosenbach NUF, Nardos B, Cohen AL, et al. Prediction of individual brain maturity using fMRI. *Science* 2010;329:1358–61.
26. Power JD, Barnes KA, Snyder AZ, et al. Spurious but systematic correlations in functional connectivity MRI networks arise from subject motion. *Neuroimage* 2012;59:2142–54.
27. Desikan RS, Segonne F, Fischl B, et al. An automated labeling system for subdividing the human cerebral cortex on MRI scans into gyral based regions of interest. *Neuroimage* 2006;31:968–80.
28. Fischl B, Salat DH, Busa E, et al. Whole brain segmentation: automated labeling of neuroanatomical structures in the human brain. *Neuron* 2002;33:341–55.
29. Fischl B, Dale AM. Measuring the thickness of the human cerebral cortex from magnetic resonance images. *Proc Natl Acad Sci USA* 2000;97:11050–5.
30. Fischl B, Sereno MI, Dale AM. Cortical surface-based analysis. II: Inflation, flattening, and a surface-based coordinate system. *Neuroimage* 1999;9:195–207.
31. Fischl B, Sereno MI, Tootell RB, et al. High-resolution intersubject averaging and a coordinate system for the cortical surface. *Hum Brain Mapp* 1999;8:272–84.
32. Dale AM, Fischl B, Sereno MI. Cortical surface-based analysis. I. Segmentation and surface reconstruction. *Neuroimage* 1999;9:179–94.
33. Cole TJ. The LMS method for constructing normalized growth standards. *Eur J Clin Nutr* 1990;44:45–60.
34. Hemmelmann C, Brose S, Vens M, et al. Percentiles of body mass index of 18-80-year-old German adults based on data from the Second National Nutrition Survey. *Dtsch Med Wochenschr* 2010;135:848–52.
35. Hebebrand J, Himmelmänn G-W, Hesecker H, et al. Use of percentiles for the body mass index in anorexia nervosa: diagnostic, epidemiological, and therapeutic considerations. *Int J Eat Disord* 1996;19:359–69.

**Appendix 1** to Geisler D, Borchardt V, Lord AR, et al. Abnormal functional global and local brain connectivity in female patients with anorexia nervosa. *J Psychiatry Neurosci* 2015.

DOI: 10.1503/jpn.140310

36. Cowdrey FA, Filippini N, Park RJ, et al. Increased resting state functional connectivity in the default mode network in recovered anorexia nervosa. *Hum Brain Mapp* 2014;35:483–91.
37. Favaro A, Santonastaso P, Manara R, et al. Disruption of visuospatial and somatosensory functional connectivity in anorexia nervosa. *Biol Psychiatry* 2012;72:864–70.
38. McFadden KL, Tregellas JR, Shott ME, et al. Reduced salience and default mode network activity in women with anorexia nervosa. *J Psychiatry Neurosci* 2014;39:178–88.
39. Amianto F, D'Agata F, Lavagnino L, et al. Intrinsic connectivity networks within cerebellum and beyond in eating disorders. *Cerebellum* 2013;12:623–31.
40. Boehm I, Geisler D, King JA, et al. Increased resting state functional connectivity in the fronto-parietal and default mode network in anorexia nervosa. *Front Behav Neurosci* 2014;8:346.
41. Favaro A, Clementi M, Manara R, et al. Catechol-O-methyltransferase genotype modifies executive functioning and prefrontal functional connectivity in women with anorexia nervosa. *J Psychiatry Neurosci* 2013;38:241–8.
42. Favaro A, Tenconi E, Degortes D, et al. Effects of obstetric complications on volume and functional connectivity of striatum in anorexia nervosa patients. *Int J Eat Disord* 2014;
43. Lee S, Ran Kim K, Ku J, et al. Resting-state synchrony between anterior cingulate cortex and precuneus relates to body shape concern in anorexia nervosa and bulimia nervosa. *Psychiatry Res* 2014;221:43–8.
44. Kim KR, Ku J, Lee J-H, et al. Functional and effective connectivity of anterior insula in anorexia nervosa and bulimia nervosa. *Neurosci Lett* 2012;521:152–7.
45. Brooks SJ, O'Daly OG, Uher R, et al. Differential neural responses to food images in women with bulimia versus anorexia nervosa. *PLoS ONE* 2011;6:e22259.
46. Cowdrey FA, Park RJ, Harmer CJ, et al. Increased neural processing of rewarding and aversive food stimuli in recovered anorexia nervosa. *Biol Psychiatry* 2011;70:736–43.
47. Frank GW, Reynolds JR, Shott ME, et al. Anorexia nervosa and obesity are associated with opposite brain reward response. *Neuropsychopharmacology* 2012;37:2031–46.
48. Gizewski ER, Rosenberger C, de Greiff A, et al. Influence of satiety and subjective valence rating on cerebral activation patterns in response to visual stimulation with high-calorie stimuli among restrictive anorectic and control women. *Neuropsychobiology* 2010;62:182–92.
49. Holsen LM, Lawson EA, Blum J, et al. Food motivation circuitry hypoactivation related to hedonic and nonhedonic aspects of hunger and satiety in women with active anorexia nervosa and weight-restored women with anorexia nervosa. *J Psychiatry Neurosci* 2012;37:322–32.
50. Lawson EA, Holsen LM, Santin M, et al. Oxytocin secretion is associated with severity of disordered eating psychopathology and insular cortex hypoactivation in anorexia nervosa. *J Clin Endocrinol Metab* 2012;97:E1898–908.
51. Oberndorfer T, Simmons A, McCurdy D, et al. Greater anterior insula activation during anticipation of food images in women recovered from anorexia nervosa versus controls. *Psychiatry Res* 2013;214:132–41.
52. Wagner A, Aizenstein H, Mazurkewicz L, et al. Altered insula response to taste stimuli in individuals recovered from restricting-type anorexia nervosa. *Neuropsychopharmacology* 2008;33:513–23.
53. Friederich H-C, Brooks S, Uher R, et al. Neural correlates of body dissatisfaction in anorexia nervosa. *Neuropsychologia* 2010;48:2878–85.
54. Mohr HM, Zimmermann J, Röder C, et al. Separating two components of body image in anorexia nervosa using fMRI. *Psychol Med* 2010;40:1519–29.
55. Redgrave GW, Bakker A, Bello NT, et al. Differential brain activation in anorexia nervosa to Fat and Thin words during a Stroop task. *Neuroreport* 2008;19:1181–5.
56. Sachdev P, Mondraty N, Wen W, et al. Brains of anorexia nervosa patients process self-images differently from non-self-images: an fMRI study. *Neuropsychologia* 2008;46:2161–8.
57. Bär K-J, Berger S, Schwier C, et al. Insular dysfunction and descending pain inhibition in anorexia nervosa. *Acta Psychiatr Scand* 2013;127:269–78.
58. Strigo IA, Matthews SC, Simmons AN, et al. Altered insula activation during pain anticipation in individuals recovered from anorexia nervosa: evidence of interoceptive dysregulation. *Int J Eat Disord* 2013;46:23–33.
